# Supplementary material for: Effects of Narrowband Light on Choroidal Thickness and the Pupil
Source: PubMed Central journal article supplement — Invest Ophthalmol Vis Sci. 2020 Aug 24;61(10):40. doi: 10.1167/iovs.61.10.40 (PMC7452857; doi:10.1167/iovs.61.10.40), 2020-08-24

**Supplementary Figure 1.**  $\alpha$ -opic irradiances for each of the five photoreceptors for **A)** broadband light, **B)** blue light, and **C)** red light, calculated using the CIE S 026 Toolbox (<https://doi.org/10.25039/S026.2018.TB>).

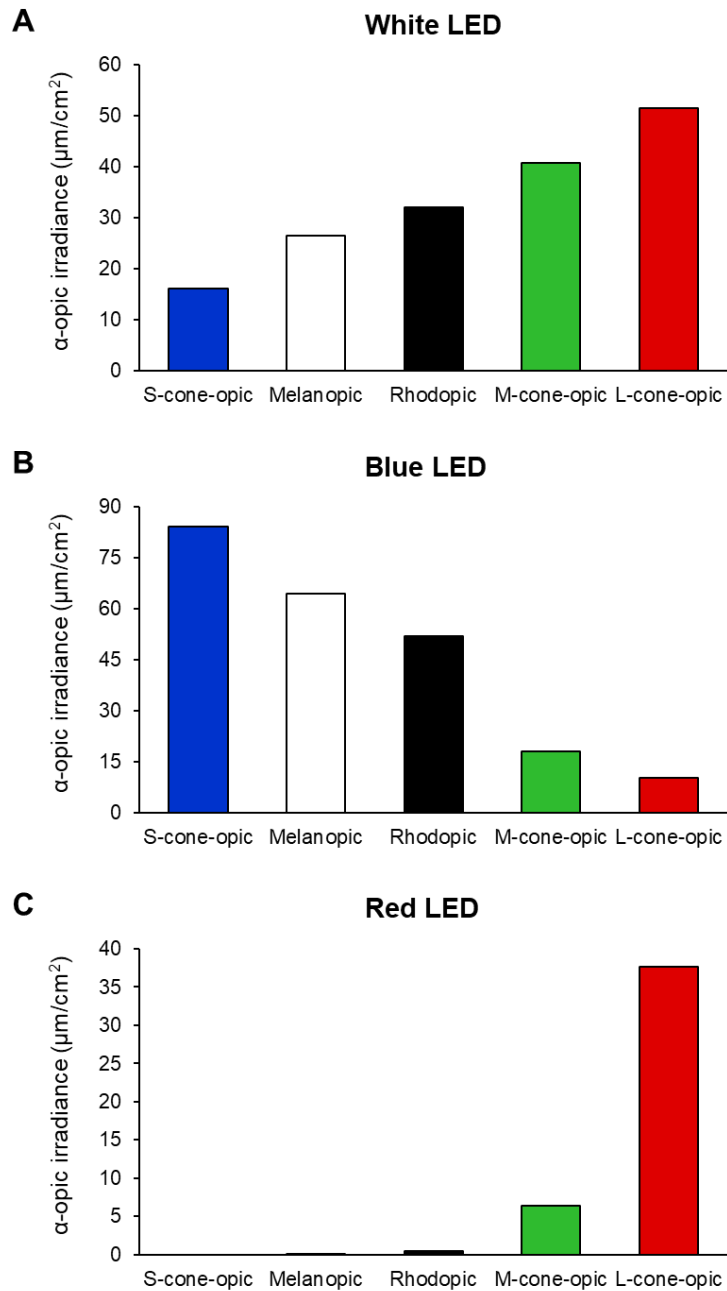

Supplement: iovs-61-10-40_s001.pdf [file iovs-61-10-40_s001.pdf]
