# Supplementary material for: Effects of Narrowband Light on Choroidal Thickness and the Pupil
Source: PubMed Central journal article supplement — Invest Ophthalmol Vis Sci. 2020 Aug 24;61(10):40. doi: 10.1167/iovs.61.10.40 (PMC7452857; doi:10.1167/iovs.61.10.40), 2020-08-24

**Supplementary Figure 2.** Mean relative pupil diameter to 1 s red and blue stimuli before and after one hour exposure to **A)** broadband light, **B)** blue light, **C)** red light, and **D)** darkness.

Shaded areas represent 95% confidence intervals.

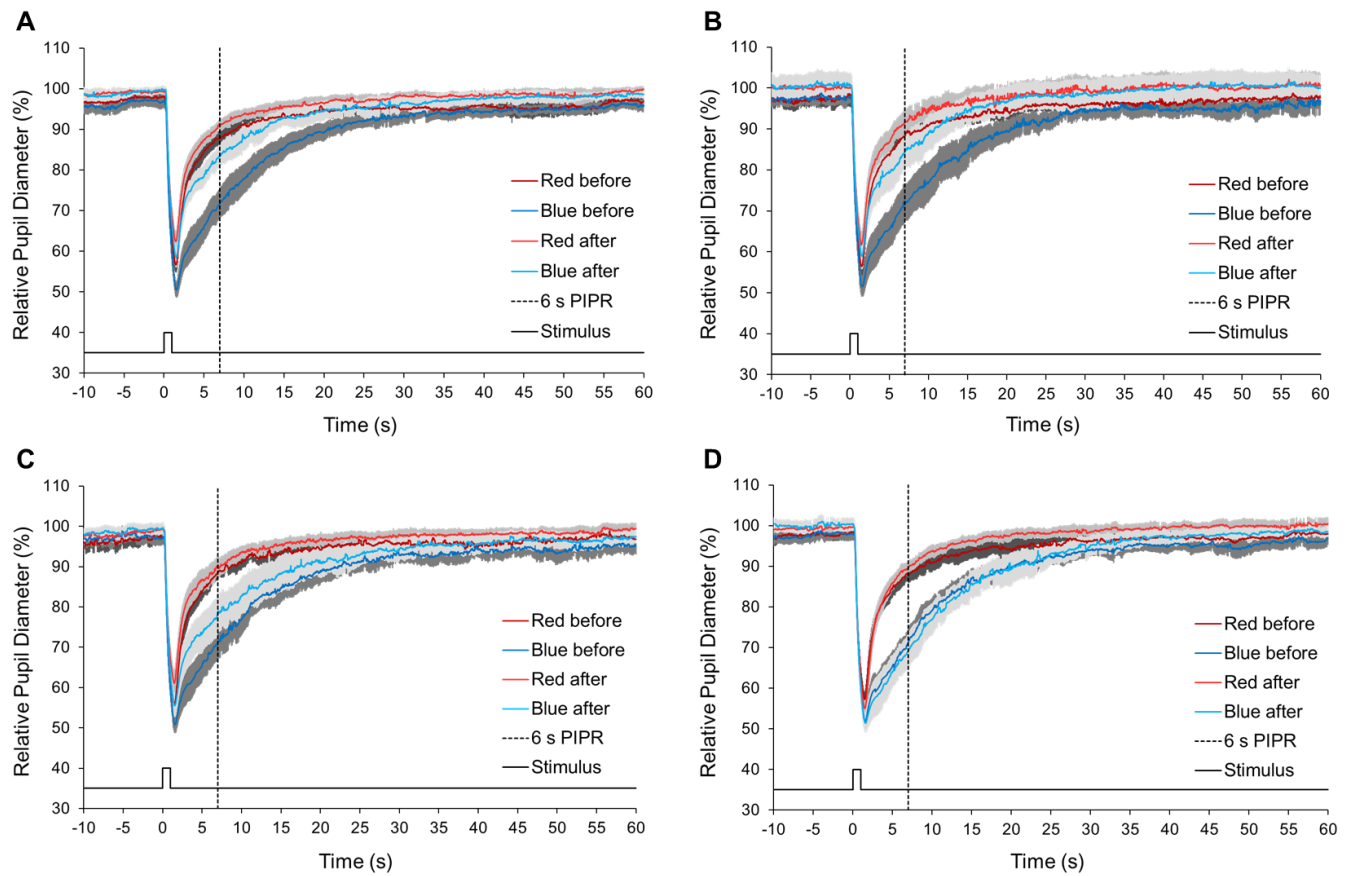

Supplement: iovs-61-10-40_s002.pdf [file iovs-61-10-40_s002.pdf]
