# Supplementary material for: Effects of Narrowband Light on Choroidal Thickness and the Pupil
Source: PubMed Central journal article supplement — Invest Ophthalmol Vis Sci. 2020 Aug 24;61(10):40. doi: 10.1167/iovs.61.10.40 (PMC7452857; doi:10.1167/iovs.61.10.40), 2020-08-24
Supplement: iovs-61-10-40_s003.pdf [file iovs-61-10-40_s003.pdf]

**Supplementary Table 1.**  $\alpha$ -opic irradiances for each of the five photoreceptors for broadband light, blue light, and red light.

| <b>Sensitivity</b> | $\lambda_{\max}$ | <b><math>\alpha</math>-opic irradiance (<math>\mu\text{m}/\text{cm}^2</math>)</b> |                   |                  |
|--------------------|------------------|-----------------------------------------------------------------------------------|-------------------|------------------|
|                    |                  | <b>Broadband<br/>Light</b>                                                        | <b>Blue Light</b> | <b>Red Light</b> |
| <b>S cone</b>      | 419.0            | 16.03                                                                             | 84.12             | 0.00             |
| <b>Melanopsin</b>  | 480.0            | 26.58                                                                             | 64.36             | 0.05             |
| <b>Rod</b>         | 496.3            | 32.09                                                                             | 51.93             | 0.42             |
| <b>M cone</b>      | 530.8            | 40.79                                                                             | 17.89             | 6.33             |
| <b>L cone</b>      | 558.4            | 51.51                                                                             | 10.13             | 37.71            |
